# Supplementary material
Source: PubMed Central journal article supplement (PMC10060458)
Supplement: 40670_2022_1699_MOESM1_ESM.pdf [file 40670_2022_1699_MOESM1_ESM.pdf]

# Research Questionnaire - Medical Student Training in a Community Paediatric Clinic

**Article Title:** Exploring undergraduate medical student experiences of training within a community-based paediatric clinic

**Journal:** Medical Science Educator

**Authors:** Lynn Buckley, Margaret Curtin, Nicola Cornally, Katherine Harford, Louise Gibson

**Corresponding author:** Lynn Buckley. **Address:** School of Public Health, Western Gateway Building, University College Cork, Cork, Ireland. **Phone:** +353-85-1646936. **Email:** [105437687@umail.ucc.ie](mailto:105437687@umail.ucc.ie)

**ORCID ID:** 0000-0002-4139-5876

## Questionnaire

### **Q1: What is your age?**

- 18-24 years
- 25-34 years
- 35-44 years
- 45-54 years
- 50+

### **Q2: What is your sex?**

- Male
- Female
- Prefer to self describe as \_\_\_\_\_ (non-binary, gender-fluid, agender, please specify)
- Prefer not to say

### **Q:3 What is your ethnicity? (Please select all that apply)**

- White/Caucasian
- Black or African American
- American Indian or Alaskan Native
- Asian or Pacific Islander
- Hispanic or Latino
- Prefer not to answer
- Other (please specify) \_\_\_\_\_

## Research Questionnaire - Medical Student Training in a Community Paediatric Clinic

### Q4: What is your highest level of educational attainment to date?

- Leaving Certificate/High School Graduate
- Undergraduate Degree
- Masters Degree
- Professional Degree
- Doctorate Degree
- Other (please specify) \_\_\_\_\_

### Q5: What is your post-graduate career focus?

- General medicine
- Paediatrics
- Surgery
- Obstetrics and gynecology
- Psychiatry
- Undecided
- Other (please specify) \_\_\_\_\_

### Q6: How did you enter this degree programme?

- Direct entry
- Graduate entry

### Q7: Prior to your work in KidScope, did you have experience of working in a community-based setting?

- Yes
- No

### Q8: Prior to your work in KidScope, how often did you work with children or families from disadvantaged communities?

- 1-----2-----3-----4-----5
- None at all                      A little                      A moderate amount                      A lot                      A great deal

## Research Questionnaire - Medical Student Training in a Community Paediatric Clinic

**Q9: During your time working in the KidScope clinic, did you gain experience of the following (tick multiple if necessary):**

- Observation of child
- Physical assessment of child
- History and note-taking
- Completing developmental questionnaires
- Interactions with family members
- Write-up of clinical reports
- Contribution to child/family support plan
- Participation in after-clinic meetings
- Other (please specify) \_\_\_\_\_

**Q10: Do you believe the KidScope Clinic gave you an opportunity to develop clinical skills?**

- 1-----2-----3-----4-----5  
Strongly disagree    Disagree    Neither disagree nor agree    Agree    Strongly agree

**Q11: To what extent do you agree your experience within the KidScope Clinic improved your understanding of child development?**

- A great deal
- A moderate amount
- Not at all

**Q12: How useful did you find the after-clinic meetings?**

- 1-----2-----3-----4-----5  
Not at all useful    Not so useful    Somewhat useful    Very useful    Extremely useful

**Q13: Do you feel the post clinic interdisciplinary meetings provided an opportunity to apply your clinical skills and knowledge learned?**

- Yes
- No

Research Questionnaire - Medical Student Training in a Community Paediatric Clinic

**Q14: To what extent do you feel the after-clinic multi-disciplinary case discussion meetings added to your overall learning?**

1-----2-----3-----4-----5  
None at all          A little          A moderate amount          A lot          A great deal

**Q15: How valuable was the practical experience you gained in KidScope to your overall learning about child health and development?**

1-----2-----3-----4-----5  
Not at all valuable    Not so valuable    Somewhat valuable    Very valuable    Extremely valuable

**Q16: What was the key learning you took away from your time in the KidScope Clinic?**

---

---

---

---

---

---

**Q17: To what extent do you believe KidScope's multi-disciplinary approach to service delivery can improve child health and development?**

1-----2-----3-----4-----5  
None at all          A little          A moderate amount          A lot          A great deal

**Q18: Did you notice a difference in the needs and/or complexity of cases presenting at KidScope compared to the hospital-based paediatric development clinic?**

Yes

No

**If yes, please elaborate:**

---

---

---

---

---

---

**Q19: Compared to a hospital-based clinic, do you feel the KidScope Clinic setting aids children and families experience of undergoing a medical assessment?**

Research Questionnaire - Medical Student Training in a Community Paediatric Clinic

Yes

No

**If yes, please elaborate:**

---

---

---

---

---

---

**Q20: Explain briefly how you feel your experience of the KidScope Clinic has contributed to your medical training.**

---

---

---

---

---

---

**Q21: Having knowledge of both a hospital-based paediatric development clinic and the KidScope Clinic, briefly outline any additional advantages or disadvantages of either or both settings on child health and development.**

---

---

---

---

---

---
